# Supplementary material for: Surface modification mediates the interaction between fullerene and lysozyme: protein structure and antibacterial activity
Source: Royal Society of Chemistry journal article supplement (doi:10.1039/d0en00645a), 2020-10-13
Supplement: d0en00645a1.pdf [file d0en00645a1.pdf]

## Electronic supplementary information

### Supplementary figures

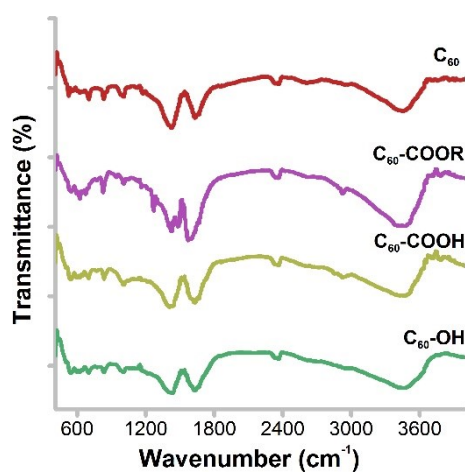

Fig. S1 IR spectra of fullerene samples.

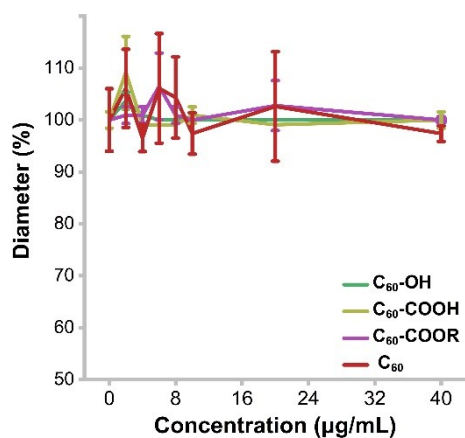

Fig. S2 Influence of fullerene samples on the diameters of antibacterial circles.
